# Supplementary material for: Do we need to improve the reporting of evidence in tendinopathy management? A critical appraisal of systematic reviews with recommendations on strength of evidence assessment
Source: PubMed Central journal article supplement (PMC7907875; doi:10.1136/bmjsem-2020-000920), 2021-02-23
Supplement: bmjsem-2020-000920supp002.pdf [file bmjsem-2020-000920supp002.pdf]

| Authors | Journal | Tendinopath | Numbe | Intervention | Outcome | Risk of | Strength of | Summary of | Meta- |
|---------|---------|-------------|-------|--------------|---------|---------|-------------|------------|-------|
|---------|---------|-------------|-------|--------------|---------|---------|-------------|------------|-------|

|                                                   | (Impact Factor)                     | y                 | r of included studies | Assessed                                                                | Measures                                | Bias Assessment Tool | Evidence Assessment Tool   | Findings                                                                                                                                                  | analysis |
|---------------------------------------------------|-------------------------------------|-------------------|-----------------------|-------------------------------------------------------------------------|-----------------------------------------|----------------------|----------------------------|-----------------------------------------------------------------------------------------------------------------------------------------------------------|----------|
| <b>Arirachakaran et al. (2017)<sup>11</sup></b>   | J Orthop Traumatol (1.273)          | Lateral Elbow     | 10                    | PRP, Autologous blood, corticosteroid injection                         | Pain, function, pain pressure threshold | Cochrane             | None                       | PRP van improve pain and fewer complications. Autologous blood can improve pain, function and pain pressure thresholds but has higher complication rates. | Yes      |
| <b>Arirachakaran et al. (2017)<sup>12</sup></b>   | Eur J Orthop Surg Traumatol (1.560) | Shoulder calcific | 7                     | ESWT, US-guided lavage, corticosteroid injection and combined treatment | Pain, function                          | Cochrane             | None                       | US-guided lavage is the treatment of choice                                                                                                               | Yes      |
| <b>Balasubramanian et al. (2015)<sup>13</sup></b> | Phys Sportsmed (1.874)              | All               | 9                     | PRP                                                                     | Pain, disability                        | Furlan et al. (2009) | Cochrane Back Review Group | PRP looks promising but more research needed                                                                                                              | No       |
| <b>Bannuru et al. (2014)<sup>14</sup></b>         | Ann Intern Med                      | Shoulder calcific | 28                    | ESWT                                                                    | Pain, function,                         | Cochrane             | None                       | High-energy ESWT is                                                                                                                                       | No       |

|                                               |                                    |               |    |                       |                                                                    |                         |                                |                                                                                                         |     |
|-----------------------------------------------|------------------------------------|---------------|----|-----------------------|--------------------------------------------------------------------|-------------------------|--------------------------------|---------------------------------------------------------------------------------------------------------|-----|
|                                               | (19.315)                           |               |    |                       | resolution of calcifications                                       |                         |                                | effective at improving pain and function                                                                |     |
| <b>Bjordal et al. (2008)<sup>15</sup></b>     | BMC Musculoskeletal Disord (2.050) | Lateral Elbow | 18 | Laser therapy         | Pain, global health, function, pain pressure threshold, sick leave | PEDro                   | None                           | Laser therapy administered with optimal doses can provide short-term pain relief and improve disability | Yes |
| <b>Boudreault et al. (2014)<sup>16</sup></b>  | J Rehabil Med (1.907)              | Shoulder      | 12 | Oral NSAIDs           | None defined                                                       | Cochrane                | None                           | Oral NSAIDs effective at reducing short-term pain but not function                                      | Yes |
| <b>Buchbinder et al. (2006)<sup>17</sup></b>  | J Rheumatol (3.187)                | Lateral Elbow | 9  | ESWT                  | Pain, function (not pre-defined)                                   | Tool devised by authors | Cochrane Musculoskeletal Group | ESWT provides little to no benefit in pain and function                                                 | Yes |
| <b>Catapano et al. (2020)<sup>18</sup></b>    | PMR (1.902)                        | Shoulder      | 5  | Dextrose Prolotherapy | None defined                                                       | Cochrane                | None                           | Prolotherapy is potentially useful adjunct to physical therapy                                          | No  |
| <b>Challoumas et al. (2019a)<sup>19</sup></b> | BMJ Open Sport Exerc Med (1.510)   | All           | 12 | Surgery               | Pain, function, ROM, treatment                                     | Cochrane                | Cochrane Back Review Group     | Surgery superior to no treatment/placebo but not                                                        | No  |

|                                               |                                    |          |    |                                     |                                                                 |          |                            |                                                                                                                                          |     |
|-----------------------------------------------|------------------------------------|----------|----|-------------------------------------|-----------------------------------------------------------------|----------|----------------------------|------------------------------------------------------------------------------------------------------------------------------------------|-----|
|                                               |                                    |          |    |                                     | success                                                         |          |                            | sham surgery or physiotherapy                                                                                                            |     |
| <b>Challoumas et al. (2019b)<sup>20</sup></b> | Br J Sports Med (11.645)           | All      | 10 | Topical GTN                         | Pain, tenderness, function, strength, ROM, patient satisfaction | Cochrane | Cochrane Back Review Group | Topical GTN superior to placebo in medium term                                                                                           | No  |
| <b>Chen et al. (2019)<sup>21</sup></b>        | Arthroscopy (4.433)                | Patellar | 11 | Non-surgical treatments             | Pain, function                                                  | PEDro    | None                       | LR-PRP is most effective non-surgical treatment                                                                                          | Yes |
| <b>Coombes et al. (2010)<sup>22</sup></b>     | Lancet (59.102)                    | All      | 41 | Corticosteroid and other injections | Pain, function, improvement                                     | PEDro    | Cochrane Back Review Group | Corticosteroid injections are effective in the short-term, other injections may provide long-term benefit for lateral elbow tendinopathy | Yes |
| <b>Dan et al. (2019)<sup>23</sup></b>         | Cochrane Database Syst Rev (7.755) | Patellar | 2  | Surgery                             | Pain, function, satisfaction, QoL, withdrawals, adverse events, | Cochrane | GRADE                      | Inconclusive due to low quality of evidence; surgery likely no more effective than eccentric                                             | Yes |

|                                                           |                                   |               |    |                |                                 |          |                            |                                                                            |     |
|-----------------------------------------------------------|-----------------------------------|---------------|----|----------------|---------------------------------|----------|----------------------------|----------------------------------------------------------------------------|-----|
|                                                           |                                   |               |    |                | tendon rupture, return to sport |          |                            | exercise                                                                   |     |
| <b>de Vos et al. (2014)<sup>24</sup></b>                  | Br J Sports Med (11.645)          | Lateral Elbow | 6  | PRP            | Pain, function                  | PEDro    | Cochrane Back Review Group | PRP not effective                                                          | No  |
| <b>Desjardins-Charbonneau et al. (2015a)<sup>25</sup></b> | Int J Sports Phys Ther (2.55)     | Shoulder      | 10 | Taping         | Pain, function, ROM, strength   | Cochrane | None                       | Inconclusive due to low quality of evidence                                | Yes |
| <b>Desjardins-Charbonneau et al. (2015b)<sup>26</sup></b> | J Orthop Sports Phys Ther (3.058) | Shoulder      | 21 | Manual therapy | Pain, function                  | Cochrane | None                       | Manual therapy may decrease pain but it is unclear if it improves function | Yes |
| <b>Desmeules et al. (2016a)<sup>27</sup></b>              | J Occup Health (1.800)            | Shoulder      | 10 | Exercise       | Work-related outcomes           | Cochrane | None                       | Exercise is effective at treating workers and promotes return to work      | No  |
| <b>Desmeules et al. (2016b)<sup>28</sup></b>              | Physiotherapy (2.534)             | Shoulder      | 6  | TENS           | Pain, ROM (not pre-defined)     | Cochrane | None                       | Inconclusive due to low quality of evidence                                | No  |
| <b>Desmeules et al. (2015)<sup>29</sup></b>               | Phys Ther Sport (2.000)           | Shoulder      | 11 | Therapeutic US | Pain, function                  | Cochrane | None                       | Therapeutic US administered with exercise no                               | Yes |

|                                                       |                             |                       |    |                     |                                    |          |      |                                                                                                                                          |     |
|-------------------------------------------------------|-----------------------------|-----------------------|----|---------------------|------------------------------------|----------|------|------------------------------------------------------------------------------------------------------------------------------------------|-----|
|                                                       |                             |                       |    |                     |                                    |          |      | more superior than exercise alone. Compared to laser treatment it is less effective at alleviating pain                                  |     |
| <b>Dong et al. (2016)</b> <sup>30</sup>               | Br J Sports Med (11.645)    | Lateral Elbow         | 27 | Injection therapies | Pain                               | Cochrane | None | Some injection therapies can be effective (e.g. BOTOX and PRP) but not corticosteroids. Hyaluronate and prolotherapy need more research. | Yes |
| <b>Dupley &amp; Charalambous (2017)</b> <sup>31</sup> | Knee Surg Relat Res (No IF) | Patellar (refractory) | 2  | PRP                 | Function                           | None     | None | PRP superior to dry needling and ESWT                                                                                                    | Yes |
| <b>Fitzpatrick et al. (2017)</b> <sup>32</sup>        | Am J Sports Med (6.093)     | All                   | 18 | PRP                 | Pain                               | Cochrane | None | Good evidence to support single injection of PRP under US guidance                                                                       | Yes |
| <b>Haslerud et al. (2015)</b> <sup>33</sup>           | Physiother Res Int (1.33)   | Shoulder              | 17 | Laser therapy       | Pain, global improvement, function | PEDro    | None | Laser therapy can offer clinically                                                                                                       | Yes |

|                                             |                                  |                                      |    |                            |                                                         |                         |                            |                                                                                              |     |
|---------------------------------------------|----------------------------------|--------------------------------------|----|----------------------------|---------------------------------------------------------|-------------------------|----------------------------|----------------------------------------------------------------------------------------------|-----|
|                                             |                                  |                                      |    |                            |                                                         |                         |                            | relevant pain relief and improvement in symptoms alone and in combination with physiotherapy |     |
| <b>Heales et al. (2020)<sup>34</sup></b>    | Musculoskel et Sci Pract (2.319) | Lateral Elbow                        | 7  | Forearm and wrist orthoses | Pain, function                                          | Joanna Briggs Institute | GRADE                      | Orthoses can improve pain and pain-free grip strength but not maximal grip strength          | No  |
| <b>Huisstede et al. (2011)<sup>35</sup></b> | Man Ther (2.158)                 | Shoulder (calcific and non-calcific) | 17 | ESWT                       | Pain, function, recovery                                | Furlan et al. (2009)    | Cochrane Back Review Group | High-energy ESWT effective for calcific but not non-calcific tendinopathy                    | No  |
| <b>Ioppolo et al. (2013)<sup>36</sup></b>   | Arch Phys Med Rehabil (2.697)    | Shoulder calcific                    | 6  | ESWT                       | Clinical improvement (function), resorption of deposits | PEDro                   | None                       | ESWT effective in terms of pain, function and resorption of calcific deposits                | Yes |
| <b>Krey et al. (2015)<sup>37</sup></b>      | Phys Sportsmed (1.874)           | All                                  | 4  | Tendon needling            | None defined                                            | None                    | None                       | Tendon needling and possible PRP improve patient-                                            | No  |

|                                            |                                             |                   |    |                               |                                    |                            |                            |                                                                                                                                     |     |
|--------------------------------------------|---------------------------------------------|-------------------|----|-------------------------------|------------------------------------|----------------------------|----------------------------|-------------------------------------------------------------------------------------------------------------------------------------|-----|
|                                            |                                             |                   |    |                               |                                    |                            |                            | reported outcome measures                                                                                                           |     |
| <b>Lafrance et al. (2019)<sup>38</sup></b> | BMJ Open Sport Exerc Med (1.510)            | Shoulder calcific | 3  | US-guided lavage              | Pain, function, calcification size | Cochrane                   | None                       | Ultrasound-guided lavage is more effective than shockwave therapy or a corticosteroid injection alone                               | No  |
| <b>Larsson et al. (2012)<sup>39</sup></b>  | Knee Surg Sports Traumatol Arthrosc (3.149) | Patellar          | 13 | All                           | None defined or used               | Cochrane Back Review Group | Cochrane Back Review Group | Eccentric training most effective, US therapy not effective. Surgery, sclerosing injections and ESWT should be further investigated | No  |
| <b>Lee et al. (2011)<sup>40</sup></b>      | J Should Elb Surg (2.865)                   | Shoulder calcific | 9  | ESWT                          | Pain, function                     | PEDro                      | NHMRC                      | Inconclusive due to low quality of evidence                                                                                         | No  |
| <b>Li et al. (2019)<sup>41</sup></b>       | Medicine (Baltimore) (1.870)                | Lateral Elbow     | 7  | PRP, corticosteroid injection | Pain, function                     | Cochrane                   | None                       | Corticosteroid injection superior to PRP in short-term                                                                              | Yes |

|                                        |                               |                           |    |                                   |                |          |          |                                                                                                                                |     |
|----------------------------------------|-------------------------------|---------------------------|----|-----------------------------------|----------------|----------|----------|--------------------------------------------------------------------------------------------------------------------------------|-----|
|                                        |                               |                           |    |                                   |                |          |          | but PRP more effective in long-term                                                                                            |     |
| <b>Liao et al. (2018)<sup>42</sup></b> | Am J Phys Med Rehabil (1.908) | Lower limb tendinopathies | 29 | ESWT                              | Pain, function | PEDro    | None     | ESWT is effective for pain and function                                                                                        | Yes |
| <b>Lin et al. (2020)<sup>43</sup></b>  | Diagnostics (Basel) (2.489)   | Shoulder                  | 5  | PRP                               | Pain, function | Cochrane | None     | PRP may be beneficial for long-term pain                                                                                       | Yes |
| <b>Lin et al. (2019)<sup>44</sup></b>  | Arch Phys Med Rehabil (2.697) | Shoulder                  | 7  | Injection therapies               | Pain, function | Cochrane | None     | Corticosteroid effective in short but not long-term, PRP and prolotherapy superior in the long-term                            | Yes |
| <b>Lin et al. (2018)<sup>45</sup></b>  | Clin Rehabil (2.738)          | Lateral Elbow             | 6  | Botulinum toxin injection (BOTOX) | Pain, function | Cochrane | None     | BOTOX injections superior to placebo and as effective as corticosteroid injections (though less effective for short-term pain) | Yes |
| <b>Littlewood et</b>                   | Physiothera                   | Shoulder                  | 4  | Exercise                          | Pain,          | Cochrane | Cochrane | Evidence                                                                                                                       | No  |

|                                                |                                 |                      |    |                                      |                                                          |                         |                      |                                                                                                                                                                                                                                |     |
|------------------------------------------------|---------------------------------|----------------------|----|--------------------------------------|----------------------------------------------------------|-------------------------|----------------------|--------------------------------------------------------------------------------------------------------------------------------------------------------------------------------------------------------------------------------|-----|
| <b>al. (2012)<sup>46</sup></b>                 | py<br>(2.534)                   |                      |    |                                      | disability                                               | Back<br>Review<br>Group | Back Review<br>Group | supports use of<br>exercise but<br>study largely<br>inconclusive                                                                                                                                                               |     |
| <b>Louwerens et al. (2014)<sup>47*</sup></b>   | J Should Elb<br>Surg<br>(2.865) | Shoulder<br>calcific | 20 | Minimally<br>invasive<br>therapies   | Pain,<br>function,<br>resorption<br>rate                 | Cochrane                | GRADE                | High-energy<br>ESWT safe and<br>effective in<br>short- and mid-<br>term                                                                                                                                                        | Yes |
| <b>Maffulli et al. (2015)<sup>48</sup></b>     | Br Med Bull<br>(2.804)          | Achilles             | 13 | Pharmacologi<br>cal<br>interventions | “Clinical or<br>functional<br>outcomes”                  | Modified<br>Coleman     | None                 | Inconclusive<br>due to low<br>quality of<br>evidence                                                                                                                                                                           | No  |
| <b>Magnussen et al. (2009)<sup>49</sup></b>    | Clin J Sport<br>Med<br>(2.702)  | Achilles             | 16 | Non-<br>operative<br>treatment       | Pain,<br>tenderness,<br>tendon<br>thickness,<br>function | None                    | None                 | Eccentric<br>exercise has the<br>most evidence<br>for<br>effectiveness.<br>ESWT,<br>injections of<br>corticosteroid,<br>sclerosing<br>agents or<br>deproteinised<br>haemodialysate<br>and topical GTN<br>need more<br>research | No  |
| <b>Martimbianco et al. (2020)<sup>50</sup></b> | Clin Rehabil<br>(2.738)         | Achilles             | 4  | Laser therapy                        | Function,<br>pain, QoL,                                  | Cochrane                | GRADE                | Inconclusive<br>due to low                                                                                                                                                                                                     | Yes |

|                                                 |                                  |            |    |                                      |                        |                |          |                                                                                                                 |     |
|-------------------------------------------------|----------------------------------|------------|----|--------------------------------------|------------------------|----------------|----------|-----------------------------------------------------------------------------------------------------------------|-----|
|                                                 |                                  |            |    |                                      | adverse events         |                |          | quality of evidence                                                                                             |     |
| <b>Mendonca et al. (2020)<sup>51</sup></b>      | Br J Sports Med (11.645)         | Patellar   | 9  | Conservative treatment               | Pain, function         | PEDro          | GRADE    | Inconclusive due to low quality of evidence                                                                     | Yes |
| <b>Miller et al. (2017)<sup>52</sup></b>        | BMJ Open Sport Exerc Med (1.510) | All        | 16 | PRP                                  | Pain (not pre-defined) | Cochrane       | None     | PRP more efficacious than control                                                                               | Yes |
| <b>Mohamadi et al. (2017)<sup>53</sup></b>      | Clin Orthop Relat Res (4.154)    | Shoulder   | 14 | Corticosteroid injections            | Pain                   | Cochrane       | None     | Corticosteroid injections provide minimal transient pain relief in a small number of patients                   | Yes |
| <b>Murphy et al. (2019)<sup>54</sup></b>        | Br J Sports Med (11.645)         | Achilles   | 7  | Heavy eccentric calf training (HECT) | Pain, function         | Cochrane RoB 2 | GRADE    | HECT may be superior to no treatment and traditional physiotherapy but inferior to other exercise interventions | Yes |
| <b>Nogueira &amp; Moura (2015)<sup>55</sup></b> | Acta Ortop Bras (0.570)          | All        | 3  | Laser therapy                        | Pain (not pre-defined) | None           | None     | Laser therapy improves pain in Achilles tendinopathy                                                            | No  |
| <b>Ortega-Castillo</b>                          | J Sci Med                        | Shoulder & | 12 | Eccentric                            | Pain,                  | PEDro          | Cochrane | Eccentric                                                                                                       | No  |

|                                                    |                          |               |    |                    |                                       |                          |                   |                                                                                                                  |     |
|----------------------------------------------------|--------------------------|---------------|----|--------------------|---------------------------------------|--------------------------|-------------------|------------------------------------------------------------------------------------------------------------------|-----|
| <b>&amp; Medina-Porqueres (2016)<sup>56</sup></b>  | Sport (3.623)            | Lateral elbow |    | exercise           | strength                              |                          | Back Review Group | exercise effective for pain and strength but its effectiveness compared to other treatments remains questionable |     |
| <b>Sussmilch-Leitch et al. (2012)<sup>57</sup></b> | J Foot Ankle Res (1.604) | Achilles      | 19 | Physical therapies | Pain, function                        | Modified PEDro, Cochrane | None              | Eccentric exercise recommended as first line with or without laser therapy. ESWT may be equally effective        | Yes |
| <b>Tsikopoulos et al. (2016)<sup>58</sup></b>      | Phys Ther Sport (2.000)  | All           | 5  | PRP                | Pain, functional disability           | Cochrane                 | None              | PRP provided no more clinical benefit than placebo or dry needling                                               | Yes |
| <b>Toliopoulos et al. (2014)<sup>59</sup></b>      | Clin Rheumatol (2.293)   | Shoulder      | 15 | Surgery            | Pain, function, ROM (not pre-defined) | Cochrane                 | None              | Surgery no more effective than exercises. Arthroscopic surgery may be superior to open for some                  | No  |

|                                                       |                               |                           |    |                         |                                 |                      |                      |                                                                                                                                                                                            |     |
|-------------------------------------------------------|-------------------------------|---------------------------|----|-------------------------|---------------------------------|----------------------|----------------------|--------------------------------------------------------------------------------------------------------------------------------------------------------------------------------------------|-----|
|                                                       |                               |                           |    |                         |                                 |                      |                      | outcome measures                                                                                                                                                                           |     |
| <b>Vander Doelen &amp; Jelley (2020)<sup>60</sup></b> | J Sci Med Sport (3.623)       | Patellar                  | 9  | Non-surgical treatments | Pain, function                  | None                 | None                 | Isometric exercise, patellar strapping, sports taping, eccentric exercise, injections with PRP, ABI, and saline and DN demonstrated a short-term pain relieving and functional improvement | No  |
| <b>Verstraelen et al. (2014)<sup>61</sup></b>         | Clin Orthop Relat Res (4.154) | Shoulder calcific         | 5  | ESWT                    | Function, radiological outcomes | Furlan et al. (2009) | None                 | High-energy more effective than low-energy ESWT for function and deposit resorption                                                                                                        | Yes |
| <b>Wasielewski &amp; Kotsko (2007)<sup>62</sup></b>   | J Athl Train (2.253)          | Lower Limb tendinopathies | 11 | Eccentric exercise      | Pain, strength                  | PEDro                | None                 | Eccentric exercise may improve pain and strength                                                                                                                                           | No  |
| <b>Woodley et al. (2007)<sup>63</sup></b>             | Br J Sports Med               | All                       | 11 | Eccentric exercise      | Pain, function,                 | PEDro, Cochrane      | Cochrane Back Review | Inconclusive due to low                                                                                                                                                                    | No  |

|                                         | (11.645)                      |                   |    |                          | satisfaction, return to work                                        | Back Review Group        | Group | quality of evidence                                                                                                             |     |
|-----------------------------------------|-------------------------------|-------------------|----|--------------------------|---------------------------------------------------------------------|--------------------------|-------|---------------------------------------------------------------------------------------------------------------------------------|-----|
| <b>Wu et al. (2017)<sup>64</sup></b>    | Arch Phys Med Rehabil (2.697) | Shoulder calcific | 14 | Non-operative treatments | Pain, function, calcification clearance                             | Cochrane, PEDro          | None  | US-guided needling and ESWT (radial and high-energy focused) alleviate pain and achieve complete resolution of calcium deposits | Yes |
| <b>Xiong et al. (2019)<sup>65</sup></b> | Phys Sportsmed (1.874)        | Lateral Elbow     | 4  | ESWT vs Corticosteroid   | Pain, function                                                      | Jadad, Cochrane          | None  | ESWT may be superior to corticosteroids                                                                                         | Yes |
| <b>Yan et al. (2019)<sup>66</sup></b>   | J Orthop Surg Res (1.907)     | Lateral Elbow     | 5  | US therapy and ESWT      | Pain, function, pain-free grip strength                             | Modified Jadad, Cochrane | None  | ESWT superior to US therapy up to 6 months for pain and pain-free grip strength                                                 | Yes |
| <b>Zhang et al. (2019)<sup>67</sup></b> | Medicine (Baltimore) (1.870)  | Shoulder calcific | 8  | US-guided lavage         | Pain, function, size of calcium deposition, calcification clearance | Cochrane                 | None  | US-guided lavage may be superior to ESWT in pain relief and calcification clearance                                             | Yes |

**Suppl. Table 1: Characteristics of included systematic reviews and their key findings.** ESWT, extracorporeal shock-wave therapy; GTN, glyceryl trinitrate; PRP, platelet-rich plasma; ROM, range of movement; TENS, transcutaneous electrical nerve stimulation; QoL, quality of life; US, ultrasound  
\*one non-randomised trial included
