# Supplementary material for: Do we need to improve the reporting of evidence in tendinopathy management? A critical appraisal of systematic reviews with recommendations on strength of evidence assessment
Source: PubMed Central journal article supplement (PMC7907875; doi:10.1136/bmjsem-2020-000920), 2021-02-23
Supplement: bmjsem-2020-000920supp003.pdf [file bmjsem-2020-000920supp003.pdf]

**Supplementary Figure 2: Useful statistical formulas**

\***Difference in means (SD)** = Mean<sub>2</sub> – Mean<sub>1</sub> ( $\frac{SD_1 + SD_2}{2}$ )

Mean<sub>1</sub> (SD<sub>1</sub>) = Mean (SD) at baseline

Mean<sub>2</sub> (SD<sub>2</sub>) = Mean (SD) at follow up

\* Not the same as mean difference (MD), which is the mean value of the combined differences in means

$$SD_{\text{pooled}} = \sqrt{\frac{[SD_1^2(n_1-1)] + [SD_2^2(n_2-1)] + \dots + [SD_k^2(n_k-1)]}{(n_1 + n_2 + \dots + n_k - k)}}$$

SD<sub>1</sub> = SD from study 1, SD<sub>2</sub> = SD from study 2 etc

n<sub>1</sub> = sample size from study 1, n<sub>2</sub> = sample size from study 2 etc

k=number of samples/studies

**Optimal Information Size (OIS)**

$$N = \frac{2(a + b)^2 SD^2}{(x_1 - x_2)}$$

N=the sample size required in each of the groups

x<sub>1</sub> – x<sub>2</sub> = minimal clinically relevant difference (defined by authors)

SD<sup>2</sup> = population variance (SD<sub>pooled</sub> can be used)

a = 1.96 (for 5% type I error)

b = 0.842 (for 80% power)

| Required statistic | Available statistic                                                           | Conversion                                                            |
|--------------------|-------------------------------------------------------------------------------|-----------------------------------------------------------------------|
| SD                 | SEM                                                                           | $SD = SEM \times \sqrt{n}$                                            |
|                    | IQR                                                                           | $SD = IQR / 1.35$                                                     |
|                    | Range                                                                         | $SD = \text{length of range} / 4$                                     |
|                    | CI                                                                            | $(\text{length of CI} / 3.92) \times \sqrt{n}$                        |
| 95% CI             | Mean <sub>1</sub> (SD <sub>1</sub> ) and mean <sub>2</sub> (SD <sub>2</sub> ) | $CI = \text{mean}_2 - \text{mean}_1 \pm 1.96(SD_{\text{pooled}} / n)$ |
| Mean               | Median                                                                        | Mean = Median                                                         |

**Useful statistical conversions. CI, confidence interval; IQR, interquartile range; n, sample size; SD, standard deviation; SEM, standard error of mean.**
